# Supplementary material
Source: PubMed Central journal article supplement (PMC8404211)
Supplement: NIHMS1730589-supplement-1.pdf [file NIHMS1730589-supplement-1.pdf]

---

**Supplemental Table 1. Guiding Questions for Provider In-Depth Interviews**

---

- 1) How long have you been doing video telehealth visits?
  - 2) Tell me about your first clinical video telehealth visit with a patient (or one you observed).
  - 3) What kind of communication challenges do you face in CVT visits that differ from in-person visits?
  - 4) What's it like to conduct aspects of the physical exam via CVT?
  - 5) Have you encountered technical problems while doing CVT? Can you tell me about those?  
Connection problems, sound problems, physical exam issues.
  - 6) How well do you think CVT meets the needs of patients?
  - 7) What have some of your colleagues said about CVT?
  - 8) If you had a colleague who was about to start CVT, what would you tell them? What do you think they need to know?
- 

---

**Supplemental Table 2. Guiding Questions for Patient In-Depth Interviews**

---

- 1) How did video visit technology affect communication with your doctor?
    - a. Did you have trouble understanding your doctor during your last video visit?
    - b. Did you tell your doctor if you didn't understand him/her? Why/Why not?
    - c. Can you tell me about any challenges to telling your doctor what you wanted to say?
    - d. Did you express your opinions? Why/Why not?
  - 2) How did you remember to discuss what you need with your doctor in the limited time of your visit?
-

---

3) What advice would you give to someone who has a video visit coming up?

---
